# Supplementary material for: Circulating tumour DNA-guided second-line targeted therapy for patients with metastatic colorectal cancer after failure of first-line cetuximab-based treatment: A prospective, phase II trial
Source: Research Square preprint supplement (doi:10.21203/rs.3.rs-7294906/v1), 2025-08-13
Supplement: Supplementary file 1 [file 11d94306a57a377abbea764f.docx]

**Supplemental methods**

*ctDNA Detection*

As part of standard care, peripheral blood (5–10 mL) was collected at baseline and at 6- to 8-week intervals during treatment and then subjected to next-generation sequencing as described in our previous study [31] with a targeted panel of 65 genes (Supplementary Table 1). The blood samples were centrifuged in Streck tubes at 1,600 × g at 4°C for 10 min. The supernatants were transferred to new tubes and stored at -80°C before use. ctDNA was extracted via the QiAmp Circulating Nucleic Acid Kit (Qiagen, Germantown, MD, USA) in accordance with the manufacturer’s instructions. DNA concentrations were quantified with the Qubit dsDNA HS Assay Kit (Thermo Fisher Scientific, Waltham, MA, USA). ctDNA was extracted and sequenced. In brief, 20–60 ng of ctDNA was subjected to end repair, tailing, and ligation with indexed adapters. Then, the libraries were PCR-amplified and purified for target enrichment. The concentration and size distribution of each library were determined via a Qubit 3.0 fluorometer (Thermo Fisher Scientific) and a LabChip GX Touch HT Analyzer (PerkinElmer, Waltham, MA, USA), respectively. For targeted capture, indexed libraries were subjected to probe-based hybridization with a customized next-generation sequencing (NGS) panel that included 65 cancer-related genes. The probe baits were used to individually synthesize 5′ biotinylated 120 base pair (bp) DNA oligonucleotides (IDT, Coralville, IA, USA). Repetitive elements were filtered out from intronic baits according to annotations by the UCSC Genome RepeatMasker. The xGen® Hybridization and Wash Kit (IDT) was used for hybridization enrichment. Briefly, 500 ng of indexed DNA libraries were pooled to obtain 2 mg of DNA. Pooled DNA samples were mixed with human Cot-1 DNA and XGen Universal Blockers-TS Mix and dried in a SpeedVac system. Hybridization Master Mix was added to each sample. The mixtures were incubated in a thermal cycler at 95°C for 10 min, combined with 4 mL of probes and incubated at 65°C overnight. The target regions were captured in accordance with the manufacturer’s instructions. The concentration and fragment size distribution of the final library were determined via a Qubit 3.0 fluorometer (Thermo Fisher Scientific) and LabChip GX Touch HT Analyser (PerkinElmer), respectively. The captured libraries were loaded onto a NovaSeq 6000 platform (Illumina, San Diego, CA, USA) for 100 bp paired-end sequencing, with a mean sequencing depth of 36000.

The raw data were mapped to the reference human genome hg19 via the Burrows–Wheeler Aligner. In-house developed software was used to generate duplex consensus sequences on the basis of dual unique molecular identifiers integrated at the ends of the DNA fragments. To improve specificity, particularly for variants with low allele frequency in the ctDNA, an in-house locus-specific variant detection model based on a binomial test was applied. The variants were subsequently filtered according to their support count, strand bias status, base quality, and mapping quality. In addition, variant calling was optimized to detect variants in short tandem repeat regions. Single-nucleotide polymorphisms (SNPs) and indels were annotated by ANNOVAR against the following databases: dbSNP (v138), 1000Genome, and ESP6500 (population frequency > 0.015). Only missense, stop-gain, frameshift, and nonframeshift indel mutations were retained. Copy number variations and gene rearrangements were also detected.

**Supplementary Table 1.** List of 65 cancer-related genes.

| **Mutation and amplification** | | | | | | | | | |
| --- | --- | --- | --- | --- | --- | --- | --- | --- | --- |
| AKT1 | ALK | APC | ARAF | ARID1A | ATM | BCL2L11 | BRAF | BRCA1 | BRCA2 |
| CCND1 | CD274 | CDK4 | CDK6 | CDKN2A | CTNNB1 | CYP2C19 | DDR2 | DPYD | EGFR |
| ERBB2 | ERBB3 | FBXW7 | FGF19 | FGFR1 | FGFR2 | FGFR3 | FLT3 | HRAS | JAK2 |
| KDR | KIT | KRAS | LRP1B | MAP2K1 | MAP2K2 | MET | MLH1 | MSH2 | MSH6 |
| MTOR | NF1 | NRAS | NTRK1 | NTRK2 | PDCD1LG2 | PDGFRA | PIK3CA | PMS2 | POLD1 |
| POLE | PTEN | RAF1 | RET | ROS1 | SMAD4 | SMO | SPTA1 | STK11 | TP53 |
| TPMT | TSC1 | TSC2 | UGT1A1 | VEGFA |  |  |  |  |  |
| **Fusion** | | | | | | | | | |
| ALK | BRAF | BRCA1 | BRCA2 | DDR2 | EGFR | FGFR1 | FGFR2 | FGFR3 | MET |
| NTRK1 | NTRK2 | PDGFRA | RAF1 | RET | ROS1 |  |  |  |  |

**Supplementary Table 2. Adverse events of interest during second-line treatment (n=24)**

|  | All patients  N=24 | | Group C (Bevacizumab)a  N=14 | | Group D (Cetuximab)  N=9 | |
| --- | --- | --- | --- | --- | --- | --- |
|  | All grade | Grade≥3 | All grade | Grade≥3 | All grade | Grade≥3 |
| Anaemia | 17 (70.8%) | 1 (4.2%) | 12 (85.7%) | 1 (7.1%) | 4 (44.4%) | 0 (0.0%) |
| Neutropaenia | 17 (70.8%) | 2 (8.3%) | 10 (71.4%) | 1 (7.1%) | 7 (77.8%) | 1 (11.1%) |
| Fatigue | 16 (66.7%) | 0 (0.0%) | 10 (71.4%) | 0 (0.0%) | 6 (66.7%) | 0 (0.0%) |
| Leucopaenia | 14 (58.3%) | 1 (4.2%) | 8 (57.1%) | 1 (7.1%) | 6 (66.7%) | 0 (0.0%) |
| Nausea | 12 (50.0%) | 0 (0.0%) | 8 (57.1%) | 0 (0.0%) | 3 (33.3%) | 0 (0.0%) |
| Constipation | 11 (45.8%) | 0 (0.0%) | 7 (50.0%) | 0 (0.0%) | 4 (44.4%) | 0 (0.0%) |
| Pruritus | 10 (41.7%) | 0 (0.0%) | 4 (28.6%) | 0 (0.0%) | 5 (55.6%) | 0 (0.0%) |
| Anorexia | 10 (41.7%) | 0 (0.0%) | 6 (42.9%) | 0 (0.0%) | 3 (33.3%) | 0 (0.0%) |
| Lymphopaenia | 10 (41.7%) | 0 (0.0%) | 5 (35.7%) | 0 (0.0%) | 5 (55.6%) | 0 (0.0%) |
| Mucositis | 9 (37.5%) | 0 (0.0%) | 6 (42.9%) | 0 (0.0%) | 3 (33.3%) | 0 (0.0%) |
| Hypoalbuminaemia | 9 (37.5%) | 0 (0.0%) | 5 (35.7%) | 0 (0.0%) | 4 (44.4%) | 0 (0.0%) |
| Dry skin | 9 (37.5%) | 0 (0.0%) | 3 (21.4%) | 0 (0.0%) | 5 (55.6%) | 0 (0.0%) |
| Diarrhoea | 9 (37.5%) | 0 (0.0%) | 5 (35.7%) | 0 (0.0%) | 3 (33.3%) | 0 (0.0%) |
| Hyponatraemia | 9 (37.5%) | 0 (0.0%) | 4 (28.6%) | 0 (0.0%) | 5 (55.6%) | 0 (0.0%) |
| ALT/AST increase | 8 (33.3%) | 1 (4.2%) | 3 (21.4%) | 0 (0.0%) | 5 (55.6%) | 1 (11.1%) |
| Vomiting | 7 (29.2%) | 0 (0.0%) | 5 (35.7%) | 0 (0.0%) | 2 (22.2%) | 0 (0.0%) |
| Hyperbilirubinaemia | 6 (25.0%) | 2 (8.3%) | 4 (28.6%) | 2 (14.3%) | 2 (22.2%) | 0 (0.0%) |
| Thrombocytopaenia | 6 (25.0%) | 0 (0.0%) | 5 (35.7) | 0 (0.0%) | 1 (11.1%) | 0 (0.0%) |
| Nail damage | 6 (25.0%) | 1 (4.2%) | 2 (14.3%) | 0 (0.0%) | 4 (44.4%) | 1 (11.1%) |
| Abdominal pain | 6 (25.0%) | 0 (0.0%) | 3 (21.4%) | 0 (0.0%) | 3 (33.3%) | 0 (0.0%) |
| Hypokalaemia | 5 (20.8%) | 0 (0.0%) | 4 (28.6%) | 0 (0.0%) | 1 (11.1%) | 0 (0.0%) |
| Rash/Erythaema | 4 (16.7%) | 0 (0.0%) | 1 (7.1%) | 0 (0.0%) | 3 (33.3%) | 0 (0.0%) |
| Hyperphosphataemia | 3 (12.5%) | 0 (0.0%) | 2 (14.3%) | 0 (0.0%) | 1 (11.1%) | 0 (0.0%) |
| Infusion-related reaction | 3 (12.5%) | 0 (0.0%) | 1 (7.1%) | 0 (0.0%) | 1 (11.1%) | 0 (0.0%) |
| Hypomagnesaemia | 2 (8.3%) | 0 (0.0%) | 0 (0.0%) | 0 (0.0%) | 2 (22.2%) | 0 (0.0%) |
| Hypophosphoraemia | 2 (8.3%) | 0 (0.0%) | 0 (0.0%) | 0 (0.0%) | 2 (22.2%) | 0 (0.0%) |
| Hypermagnesaemia | 2 (8.3%) | 0 (0.0%) | 1 (7.1%) | 0 (0.0%) | 1 (11.1%) | 0 (0.0%) |
| Hypercalcaemia | 1 (4.2%) | 0 (0.0%) | 1 (7.1%) | 0 (0.0%) | 0 (0.0%) | 0 (0.0%) |
| Conjunctivitis | 1 (4.2%) | 0 (0.0%) | 0 (0.0%) | 0 (0.0%) | 1 (11.1%) | 0 (0.0%) |
| Hypocalcaemia | 1 (4.2%) | 0 (0.0%) | 0 (0.0%) | 0 (0.0%) | 1 (11.1%) | 0 (0.0%) |
| Renal and urinary disorders | 1 (4.2%) | 0 (0.0%) | 0 (0.0%) | 0 (0.0%) | 0 (0.0%) | 0 (0.0%) |
| Hypertension | 1 (4.2%) | 0 (0.0%) | 1 (7.1%) | 0 (0.0%) | 0 (0.0%) | 0 (0.0%) |

aHere, both patients with mutated RAS and patients with wild-type RAS who received bevacizumab-based second-line therapy are included.
